# Supplementary material for: Determinants of the varied profiles of Plasmodium falciparum infections among infants living in Kintampo, Ghana
Source: Springer Nature journal article supplement (doi:10.1186/s12936-021-03752-9), 2021-05-29
Supplement: MOESM2 [file 19209508]

**Additional file 2. Distribution of maternal and pregnancy factors between groups of infants**

| Characteristic                              | Category                | Level                      | Parasite negative<br>N = 459<br>n (%) | Only-<br>asymptomatic<br>N = 87<br>n (%) | Only-<br>symptomatic<br>N = 444<br>n (%) | Alternating<br>N = 274<br>n (%) | Overall<br>P-value | Parasite<br>negative<br>vs.<br>Only-<br>symptomatic<br>P- value | Parasite<br>negative<br>vs.<br>Only-<br>asymptomatic<br>P- value | Parasite<br>negative<br>vs.<br>Alternating<br>P-value | Only-<br>asymptomatic<br>vs.<br>Only-<br>symptomatic<br>P- value | Only-<br>asymptomatic<br>vs.<br>Alternating<br>P- value |
|---------------------------------------------|-------------------------|----------------------------|---------------------------------------|------------------------------------------|------------------------------------------|---------------------------------|--------------------|-----------------------------------------------------------------|------------------------------------------------------------------|-------------------------------------------------------|------------------------------------------------------------------|---------------------------------------------------------|
| <b>Age of mother</b>                        | <b>Years</b>            | Median (IQR <sup>e</sup> ) | 26 (22, 31)                           | 27 (23, 32)                              | 27 (21, 32)                              | 26 (21, 31)                     | 0.810              | 0.817                                                           | 0.398                                                            | 0.753                                                 | 0.536                                                            | 0.339                                                   |
|                                             | <b>Age groups</b>       | < 20                       | 58 (12.7)                             | 11 (12.6)                                | 82 (18.8)                                | 41 (15.2)                       | 0.094              | <b>0.017</b>                                                    | 0.912                                                            | 0.576                                                 | 0.479                                                            | 0.465                                                   |
|                                             |                         | 20 – 29                    | 272 (59.6)                            | 52 (59.8)                                | 227 (51.9)                               | 156 (57.8)                      |                    |                                                                 |                                                                  |                                                       |                                                                  |                                                         |
|                                             |                         | 30 – 40                    | 116 (25.4)                            | 21 (24.1)                                | 110 (25.2)                               | 70 (25.9)                       |                    |                                                                 |                                                                  |                                                       |                                                                  |                                                         |
|                                             |                         | > 40                       | 10 (2.2)                              | 3 (3.4)                                  | 18 (4.1)                                 | 3 (1.1)                         |                    |                                                                 |                                                                  |                                                       |                                                                  |                                                         |
| <b>Pregnancy</b>                            | <b>Gravidity</b>        | Primagravidae              | 89 (19.4)                             | 13 (14.9)                                | 76 (17.1)                                | 45 (16.4)                       | 0.620              | 0.377                                                           | 0.329                                                            | 0.315                                                 | 0.620                                                            | 0.743                                                   |
|                                             |                         | Multigravidae              | 370 (80.6)                            | 74 (85.1)                                | 368 (82.9)                               | 229 (83.6)                      |                    |                                                                 |                                                                  |                                                       |                                                                  |                                                         |
|                                             | <b>Parity</b>           | 0                          | 89 (19.4)                             | 13 (14.9)                                | 76 (17.1)                                | 45 (16.4)                       | 0.140              | 0.057                                                           | 0.758                                                            | <b>0.032</b>                                          | 0.702                                                            | 0.833                                                   |
|                                             |                         | 1                          | 85 (18.5)                             | 17 (19.5)                                | 76 (17.1)                                | 44 (16.1)                       |                    |                                                                 |                                                                  |                                                       |                                                                  |                                                         |
|                                             |                         | 2                          | 93 (20.3)                             | 15 (17.2)                                | 73 (16.4)                                | 38 (13.9)                       |                    |                                                                 |                                                                  |                                                       |                                                                  |                                                         |
|                                             |                         | 3                          | 62 (13.5)                             | 14 (16.1)                                | 52 (11.7)                                | 47 (17.2)                       |                    |                                                                 |                                                                  |                                                       |                                                                  |                                                         |
|                                             | ≥ 4                     | 130 (28.3)                 | 28 (32.2)                             | 167 (37.6)                               | 100 (36.5)                               |                                 |                    |                                                                 |                                                                  |                                                       |                                                                  |                                                         |
| <b>Sickle cell trait/disease</b>            |                         | Yes                        | 452 (99.6)                            | 86 (98.9)                                | 436 (99.5)                               | 272 (100.0)                     | 0.500              | 0.971                                                           | 0.415                                                            | 0.273                                                 | 0.434                                                            | 0.077                                                   |
|                                             |                         | No                         | 2 (0.4)                               | 1 (1.1)                                  | 2 (0.5)                                  | 0 (0.0)                         |                    |                                                                 |                                                                  |                                                       |                                                                  |                                                         |
| <b>ANC<sup>a</sup> attendance</b>           | <b>Start (months)</b>   | Median (IQR)               | 4 (3, 5)                              | 4 (3, 5)                                 | 5 (3, 5)                                 | 4 (3, 6)                        | <b>&lt;0.001</b>   | <b>&lt; 0.001</b>                                               | 0.072                                                            | <b>&lt; 0.001</b>                                     | 0.595                                                            | 0.192                                                   |
|                                             | <b>Visits</b>           | Median (IQR)               | 5 (4, 7)                              | 4 (3, 5)                                 | 5 (3, 6)                                 | 4 (3, 6)                        | <b>&lt;0.001</b>   | <b>&lt; 0.001</b>                                               | <b>&lt; 0.001</b>                                                | <b>&lt; 0.001</b>                                     | <b>0.039</b>                                                     | 0.618                                                   |
| <b>Tetanus immunization</b>                 | <b>Frequency</b>        | Median (IQR)               | 1 (1, 2)                              | 1 (0, 1)                                 | 1 (1, 2)                                 | 1 (0, 1)                        | <b>0.006</b>       | 0.146                                                           | <b>0.004</b>                                                     | <b>0.002</b>                                          | 0.089                                                            | 0.407                                                   |
| <b>IPTp<sup>b</sup></b>                     | <b>Doses</b>            | 0                          | 28 (6.1)                              | 6 (6.9)                                  | 16 (3.6)                                 | 17 (6.2)                        | <b>0.022</b>       | <b>0.024</b>                                                    | 0.177                                                            | <b>0.005</b>                                          | 0.495                                                            | 0.870                                                   |
|                                             |                         | 1                          | 42 (9.2)                              | 14 (16.1)                                | 63 (14.2)                                | 40 (14.7)                       |                    |                                                                 |                                                                  |                                                       |                                                                  |                                                         |
|                                             |                         | 2                          | 110 (24.0)                            | 23 (26.4)                                | 118 (26.6)                               | 85 (31.1)                       |                    |                                                                 |                                                                  |                                                       |                                                                  |                                                         |
|                                             |                         | 3                          | 278 (60.7)                            | 44 (50.6)                                | 246 (55.5)                               | 131 (48.0)                      |                    |                                                                 |                                                                  |                                                       |                                                                  |                                                         |
|                                             | <b>DOTs<sup>d</sup></b> | Yes                        | 402 (93.3)                            | 73 (90.1)                                | 413 (95.8)                               | 247 (95.7)                      | 0.092              | 0.099                                                           | 0.315                                                            | 0.181                                                 | <b>0.032</b>                                                     | 0.055                                                   |
|                                             | No                      | 29 (6.7)                   | 8 (9.9)                               | 18 (4.2)                                 | 11 (4.3)                                 |                                 |                    |                                                                 |                                                                  |                                                       |                                                                  |                                                         |
| <b>ITN<sup>c</sup> use during pregnancy</b> | <b>Overall</b>          | Yes                        | 226 (49.5)                            | 52 (61.2)                                | 223 (50.6)                               | 122 (45.4)                      | 0.084              | 0.739                                                           | <b>0.047</b>                                                     | 0.286                                                 | 0.073                                                            | <b>0.011</b>                                            |
|                                             |                         | No                         | 231 (50.5)                            | 33 (38.8)                                | 218 (49.4)                               | 147 (54.6)                      |                    |                                                                 |                                                                  |                                                       |                                                                  |                                                         |
|                                             | <b>Rural</b>            | Yes                        | 152 (46.5)                            | 43 (59.7)                                | 191 (49.5)                               | 108 (43.7)                      | 0.110              | 0.594                                                           | <b>0.042</b>                                                     | 0.511                                                 | 0.079                                                            | <b>0.017</b>                                            |
|                                             | No                      | 175 (53.5)                 | 29 (40.3)                             | 203 (51.5)                               | 139 (56.3)                               |                                 |                    |                                                                 |                                                                  |                                                       |                                                                  |                                                         |

|                          |                        |                                       |            |           |            |            |              |              |       |                   |              |              |
|--------------------------|------------------------|---------------------------------------|------------|-----------|------------|------------|--------------|--------------|-------|-------------------|--------------|--------------|
|                          | <b>Urban</b>           | Yes                                   | 74 (56.9)  | 9 (69.2)  | 34 (68.1)  | 14 (63.6)  | 0.510        | 0.129        | 0.391 | 0.555             | 0.991        | 0.736        |
|                          |                        | No                                    | 56 (43.1)  | 4 (30.8)  | 15 (31.9)  | 8 (36.4)   |              |              |       |                   |              |              |
| <b>Placental malaria</b> | <b>Overall</b>         | Negative                              | 299 (65.1) | 58 (66.7) | 271 (61.0) | 165 (60.2) | <b>0.018</b> | 0.136        | 0.097 | <b>0.040</b>      | <b>0.010</b> | <b>0.030</b> |
|                          |                        | Past                                  | 138 (30.1) | 23 (26.4) | 143 (32.2) | 84 (30.7)  |              |              |       |                   |              |              |
|                          |                        | Chronic                               | 10 (2.2)   | 0 (0.0)   | 21 (4.7)   | 17 (6.2)   |              |              |       |                   |              |              |
|                          |                        | Acute                                 | 12 (2.6)   | 6 (6.9)   | 9 (2.0)    | 8 (2.9)    |              |              |       |                   |              |              |
|                          | <b>Rural</b>           | Negative                              | 215 (65.3) | 51 (68.9) | 244 (61.6) | 154 (61.1) | 0.870        | 0.470        | 0.068 | 0.173             | <b>0.026</b> | <b>0.040</b> |
|                          |                        | Past                                  | 98 (29.8)  | 18 (24.3) | 124 (31.3) | 75 (29.8)  |              |              |       |                   |              |              |
|                          |                        | Chronic                               | 9 (2.7)    | 0 (0.0)   | 19 (4.8)   | 16 (6.3)   |              |              |       |                   |              |              |
|                          |                        | Acute                                 | 7 (2.1)    | 5 (6.8)   | 9 (2.3)    | 7 (2.8)    |              |              |       |                   |              |              |
|                          | <b>Urban</b>           | Negative                              | 84 (64.6)  | 7 (53.8)  | 27 (56.3)  | 11 (50.0)  | 0.530        | 0.141        | 0.812 | 0.347             | 0.236        | 0.857        |
|                          |                        | Past                                  | 40 (30.8)  | 5 (38.5)  | 19 (39.6)  | 9 (40.9)   |              |              |       |                   |              |              |
|                          |                        | Chronic                               | 1 (0.8)    | 0 (0.0)   | 2 (4.2)    | 1 (4.5)    |              |              |       |                   |              |              |
|                          |                        | Acute                                 | 5 (3.8)    | 1 (7.7)   | 0 (0.0)    | 1 (4.5)    |              |              |       |                   |              |              |
| <b>Delivery</b>          | <b>Gestational age</b> | Pre-term                              | 6 (1.3)    | 1 (1.1)   | 3 (0.7)    | 0 (0.0)    | 0.570        | 0.572        | 0.804 | 0.164             | 0.608        | 0.161        |
|                          |                        | Term                                  | 399 (87.1) | 78 (89.7) | 385 (86.7) | 238 (87.8) |              |              |       |                   |              |              |
|                          |                        | Late                                  | 53 (11.6)  | 8 (9.2)   | 56 (12.6)  | 33 (12.2)  |              |              |       |                   |              |              |
|                          | <b>Place</b>           | Health facility                       | 320 (69.7) | 59 (67.8) | 259 (58.3) | 149 (54.4) | <b>0.002</b> | <b>0.004</b> | 0.806 | <b>&lt; 0.001</b> | 0.268        | 0.081        |
|                          |                        | Private maternity home                | 17 (3.7)   | 2 (2.3)   | 28 (6.3)   | 12 (4.4)   |              |              |       |                   |              |              |
|                          |                        | Home/TBA <sup>f</sup>                 | 121 (26.4) | 26 (29.9) | 156 (35.1) | 113 (41.2) |              |              |       |                   |              |              |
|                          |                        | On the way to HF/PMH/TBA <sup>f</sup> | 1 (0.2)    | 0 (0.0)   | 1 (0.2)    | 0 (0.0)    |              |              |       |                   |              |              |

<sup>a</sup> ANC = antenatal care, <sup>b</sup> IPTp = intermittent preventive treatment during pregnancy, <sup>c</sup> ITN = insecticide treated bed-net, <sup>d</sup> DOTs = direct observed therapy, <sup>e</sup> IQR = interquartile range, <sup>f</sup> HF = health facility PMH = private maternity home, TBA= traditional birth attendant
