# Supplementary material for: Determinants of the varied profiles of Plasmodium falciparum infections among infants living in Kintampo, Ghana
Source: Springer Nature journal article supplement (doi:10.1186/s12936-021-03752-9), 2021-05-29
Supplement: MOESM3 [file 19209508]

**Additional file 3. Parasite negative versus only-asymptomatic\*, only-symptomatic\* and alternating\***

| Characteristic                | Level                                 | Parasite negative group<br>N = 459<br>n (%) | Parasite positive group<br>N= 805<br>n (%) | p-value        |
|-------------------------------|---------------------------------------|---------------------------------------------|--------------------------------------------|----------------|
| <b>Residence</b>              | Rural                                 | 329 (71.7)                                  | 722 (89.7)                                 | < <b>0.001</b> |
|                               | Urban                                 | 130 (28.3)                                  | 83 (10.3)                                  |                |
| <b>Socio-economic status</b>  | Least poor                            | 132 (28.8)                                  | 88 (10.9)                                  | < <b>0.001</b> |
|                               | Less poor                             | 109 (23.7)                                  | 143 (17.8)                                 |                |
|                               | Poor                                  | 95 (20.7)                                   | 180 (22.4)                                 |                |
|                               | Poorer                                | 76 (16.6)                                   | 184 (22.9)                                 |                |
|                               | Most poor                             | 47 (10.2)                                   | 210 (26.1)                                 |                |
| <b>Parity</b>                 | 0                                     | 89 (19.4)                                   | 134 (16.6)                                 | <b>0.024</b>   |
|                               | 1                                     | 85 (18.5)                                   | 137 (17.0)                                 |                |
|                               | 2                                     | 93 (20.3)                                   | 126 (15.7)                                 |                |
|                               | 3                                     | 62 (13.5)                                   | 113 (14.0)                                 |                |
|                               | ≥ 4                                   | 130 (28.3)                                  | 295 (36.6)                                 |                |
| <b>IPTp<sup>a</sup> doses</b> | 0                                     | 28 (6.1)                                    | 39 (4.9)                                   | <b>0.004</b>   |
|                               | 1                                     | 42 (9.2)                                    | 117 (14.6)                                 |                |
|                               | 2                                     | 110 (24.0)                                  | 226 (28.1)                                 |                |
|                               | 3                                     | 278 (60.7)                                  | 421 (52.4)                                 |                |
| <b>Delivery place</b>         | Health facility                       | 320 (69.7)                                  | 467 (58.0)                                 | <b>0.001</b>   |
|                               | Private maternity home                | 17 (3.7)                                    | 42 (5.2)                                   |                |
|                               | Home/TBA <sup>b</sup>                 | 121 (26.4)                                  | 295 (36.6)                                 |                |
|                               | On the way to HF/PMH/TBA <sup>c</sup> | 1 (0.2)                                     | 1 (0.1)                                    |                |

\* = Parasite positive group. <sup>a</sup> IPTp = intermittent preventive treatment during pregnancy, <sup>b</sup> TBA= traditional birth attendant, <sup>c</sup> HF = health facility, PMH = private maternity home.
