# Supplementary material for: Determinants of the varied profiles of Plasmodium falciparum infections among infants living in Kintampo, Ghana
Source: Springer Nature journal article supplement (doi:10.1186/s12936-021-03752-9), 2021-05-29
Supplement: MOESM4 [file 19209508]

## Additional file 4: Sickle cell variation and time to first malaria infection

### A. Only-asymptomatic

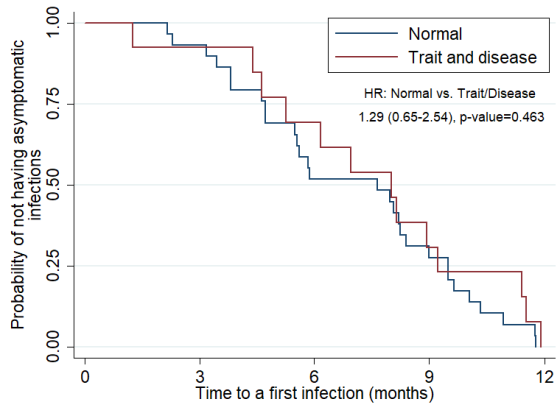

| Number at risk    | 0  | 3  | 6  | 9 | 12 |
|-------------------|----|----|----|---|----|
| Normal            | 29 | 27 | 15 | 9 | 0  |
| Trait and disease | 13 | 12 | 9  | 4 | 0  |

### B. Only-symptomatic

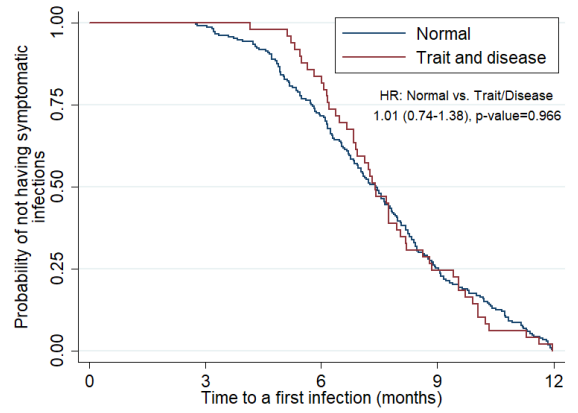

| Number at risk    | 0   | 3   | 6   | 9  | 12 |
|-------------------|-----|-----|-----|----|----|
| Normal            | 207 | 205 | 148 | 52 | 0  |
| Trait and disease | 49  | 49  | 41  | 12 | 0  |

### C. Alternating

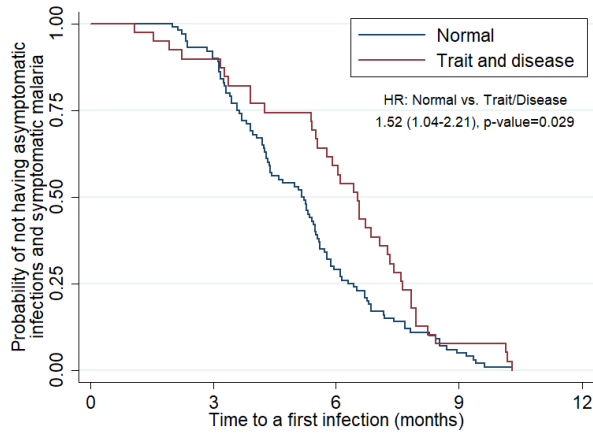

| Number at risk    | 0   | 3  | 6  | 9 | 12 |
|-------------------|-----|----|----|---|----|
| Normal            | 100 | 90 | 29 | 5 | 0  |
| Trait and disease | 39  | 35 | 23 | 3 | 0  |
