# Supplementary material for: Determinants of the varied profiles of Plasmodium falciparum infections among infants living in Kintampo, Ghana
Source: Springer Nature journal article supplement (doi:10.1186/s12936-021-03752-9), 2021-05-29
Supplement: MOESM5 [file 19209508]

## Additional file 5: G6PD deficiency and time to first malaria infection

### A. Only-asymptomatic

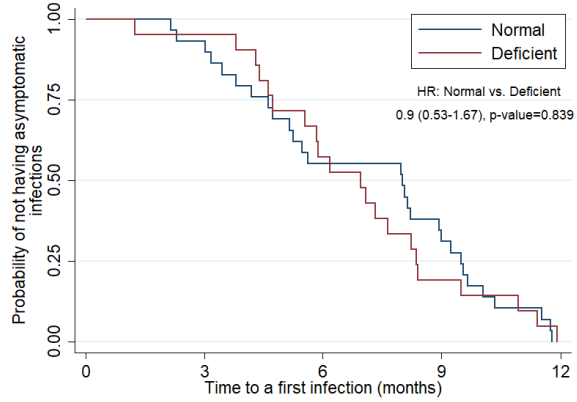

| Number at risk | 0  | 3  | 6  | 9  | 12 |
|----------------|----|----|----|----|----|
| Normal         | 29 | 27 | 16 | 10 | 0  |
| Deficient      | 21 | 20 | 12 | 4  | 0  |

### B. Only-symptomatic

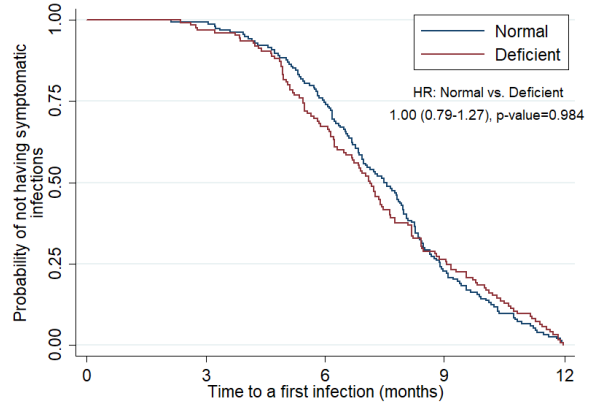

| Number at risk | 0   | 3   | 6   | 9  | 12 |
|----------------|-----|-----|-----|----|----|
| Normal         | 154 | 153 | 115 | 35 | 0  |
| Deficient      | 125 | 121 | 84  | 33 | 0  |

### C. Alternating

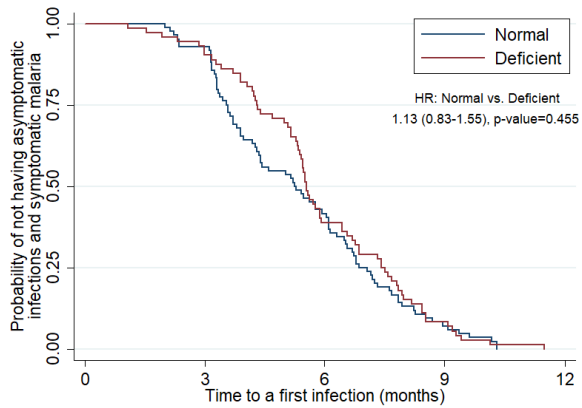

| Number at risk | 0  | 3  | 6  | 9 | 12 |
|----------------|----|----|----|---|----|
| Normal         | 84 | 78 | 35 | 6 | 0  |
| Deficient      | 72 | 65 | 28 | 6 | 0  |
